# Supplementary material for: Efficient absorption of ammonia with hydroxyl-functionalized ionic liquids
Source: Royal Society of Chemistry journal article supplement (doi:10.1039/c5ra13730f), 2015-01-01
Supplement: c5ra13730f1.pdf [file c5ra13730f1.pdf]

## Supplementary Information

### **Efficient Absorption of Ammonia with Hydroxyl-functionalized Ionic Liquids**

Zhijie Li,<sup>ab</sup> Xiangping Zhang,<sup>\*a</sup> Haifeng Dong,<sup>a</sup> Xiaochun Zhang,<sup>a</sup> Hongshuai Gao,<sup>a</sup> Suojiang Zhang,<sup>\*a</sup> Jianwei Li<sup>b</sup> and Congmin Wang<sup>c</sup>

<sup>a</sup> Beijing Key Laboratory of Ionic Liquids Clean Process, State Key Laboratory of Multiphase Complex Systems, Institute of Process Engineering, Chinese Academy of Sciences, Beijing, 100190, China

<sup>b</sup> State Key Laboratory of Chemical Resource Engineering, Beijing University of Chemical Technology, Beijing, 100029, China

<sup>c</sup> Department of Chemistry, Zhejiang University, Hangzhou, 310027, China

Xiangping Zhang, PhD  
Institute of Process Engineering  
Chinese Academy of Sciences  
Beijing 100190, PR,  
E-mail: xpzhang@ipe.ac.cn  
Tel: 0086-10-62558174

## 1. Synthetic route of [EtOHmim][NTf<sub>2</sub>].

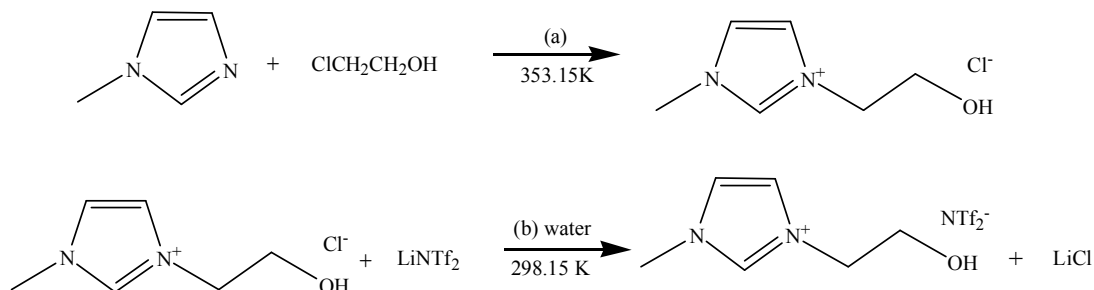

**Scheme S1.** Synthetic route of [EtOHmim][NTf<sub>2</sub>].

## 2. NMR data of ILs.

[EtOHmim][Cl]: <sup>1</sup>H NMR (*d*<sub>6</sub>-DMSO): 9.21(s, 1H), 7.76(t, 1H), 7.72(t, 1H), 5.38(s, 1H), 4.23(t, 2H), 3.88(s, 3H), 3.72(t, 2H); <sup>13</sup>C NMR (*d*<sub>6</sub>-DMSO): 136.84, 123.26, 122.64, 59.25, 51.53, 35.62.

[EtOHmim][NTf<sub>2</sub>]: <sup>1</sup>H NMR (*d*<sub>6</sub>-DMSO): 9.07(s, 1H), 7.70(t, 1H), 7.66(t, 1H), 5.16(s, 1H), 4.22(t, 2H), 3.87(s, 3H), 3.74(t, 2H); <sup>13</sup>C NMR (*d*<sub>6</sub>-DMSO): 136.78, 123.23, 122.56, 120.51, 118.38, 59.25, 51.59, 35.54.

[EtOHmim][PF<sub>6</sub>]: <sup>1</sup>H NMR (*d*<sub>6</sub>-DMSO): 9.04(s, 1H), 7.67(t, 1H), 7.63(t, 1H), 5.18(s, 1H), 4.21(t, 2H), 3.86(s, 3H), 3.74(t, 2H); <sup>13</sup>C NMR (*d*<sub>6</sub>-DMSO): 136.72, 123.20, 122.55, 59.27, 51.59, 35.49.

[EtOHmim][BF<sub>4</sub>]: <sup>1</sup>H NMR (*d*<sub>6</sub>-DMSO): 9.01(s, 1H), 7.68(t, 1H), 7.64(t, 1H), 5.15(s, 1H), 4.21(t, 2H), 3.87(s, 3H), 3.74(t, 2H); <sup>13</sup>C NMR (*d*<sub>6</sub>-DMSO): 136.68, 123.20, 122.51, 59.29, 51.57, 35.54.

[EtOHmim][SCN]: <sup>1</sup>H NMR (*d*<sub>6</sub>-DMSO): 9.04(s, 1H), 7.67(t, 1H), 7.63(t, 1H), 5.18(s, 1H), 4.21(t, 2H), 3.86(s, 3H), 3.74(t, 2H); <sup>13</sup>C NMR (*d*<sub>6</sub>-DMSO): 136.76, 123.31,

122.62, 59.29, 51.63, 35.68.

[EtOHmim][DCA]:  $^1\text{H}$  NMR ( $d_6$ -DMSO): 9.07(s, 1H), 7.71(t, 1H), 7.68(t, 1H), 5.15(s, 1H), 4.21(t, 2H), 3.87(s, 3H), 3.73(t, 2H);  $^{13}\text{C}$  NMR ( $d_6$ -DMSO):136.77, 123.31, 122.62, 119.04, 59.28, 51.61, 35.65.

[EtOHmim][NO<sub>3</sub>]:  $^1\text{H}$  NMR ( $d_6$ -DMSO): 9.17(s, 1H), 7.76(t, 1H), 7.73(t, 1H), 5.26(s, 1H), 4.24(t, 2H), 3.89(s, 3H), 3.74(t, 2H);  $^{13}\text{C}$  NMR ( $d_6$ -DMSO):136.86, 123.30, 122.61, 59.33, 51.57, 35.52.

[Emim][NTf<sub>2</sub>]:  $^1\text{H}$  NMR ( $d_6$ -DMSO): 9.04(s, H) 7.74 (t, 1H), 7.66 (t, 1H), 4.19 (t, 2H), 3.85 (s, 3H), 1.42 (t, 3H).

### 3. The viscosity activation energy ( $E_a$ ) of ILs.

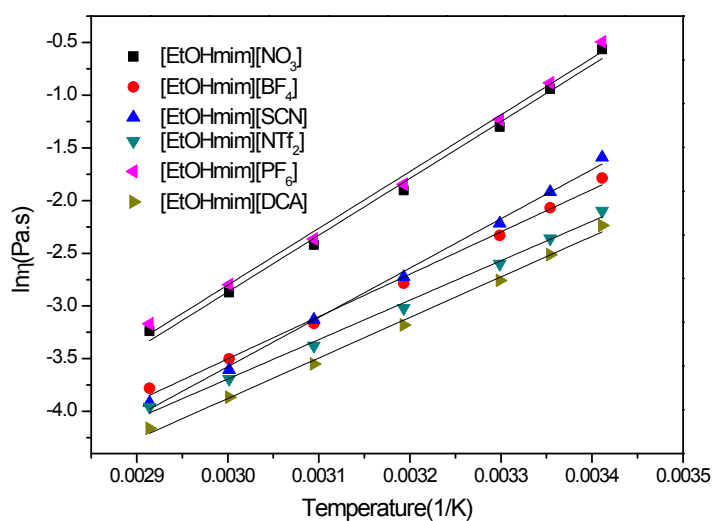

**Figure S1.** Semi-logarithmic Arrhenius-like plots.

**Table S1.** Fitted Arrhenius parameters of ILs with the [EtOHmim] cation.

| [EtOHmim]X         | $E_a$ (kJ/mol) |
|--------------------|----------------|
| [PF <sub>6</sub> ] | -44.81         |
| [NO <sub>3</sub> ] | -44.79         |
| [SCN]              | -38.89         |

|                     |        |
|---------------------|--------|
| [BF <sub>4</sub> ]  | -33.39 |
| [NTf <sub>2</sub> ] | -31.11 |
| [DCA]               | -31.10 |

#### 4. TGA results of hydroxyl-functionalized ILs.

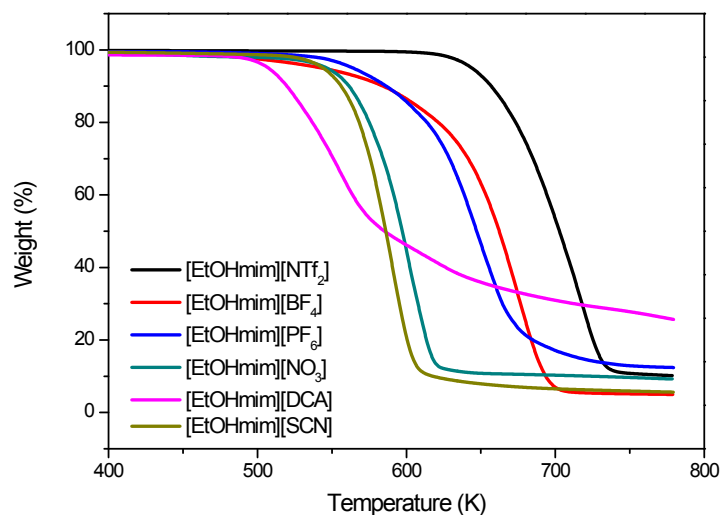

Figure S2. TGA traces of task-specific ILs.

#### 5. Solubility of NH<sub>3</sub> in hydroxyl-functionalized ILs.

Table S2. The solubilities of NH<sub>3</sub> in task-specific ILs.

| T=298.15 K                   |                  | T=313.15 K |                  | T=323.1 K |                  | T=333.15 K |                  | T=343.15 K |                  |
|------------------------------|------------------|------------|------------------|-----------|------------------|------------|------------------|------------|------------------|
| P / kPa                      | X <sub>NH3</sub> | P / kPa    | X <sub>NH3</sub> | P / kPa   | X <sub>NH3</sub> | P / kPa    | X <sub>NH3</sub> | P / kPa    | X <sub>NH3</sub> |
| [EtOHmim][NTf <sub>2</sub> ] |                  |            |                  |           |                  |            |                  |            |                  |
| 105.50                       | 0.4944           | 127.79     | 0.4536           | 163.45    | 0.4689           | 116.83     | 0.3544           | 114.41     | 0.3299           |
| 209.51                       | 0.6046           | 206.36     | 0.5298           | 325.05    | 0.5853           | 216.76     | 0.4628           | 239.24     | 0.4554           |
| 307.40                       | 0.6733           | 305.74     | 0.5956           | 440.77    | 0.6392           | 387.66     | 0.5693           | 397.31     | 0.5485           |
| 406.95                       | 0.7287           | 400.10     | 0.6438           | 498.83    | 0.6613           | 473.28     | 0.6067           | 539.22     | 0.6066           |
| 517.48                       | 0.7805           | 599.77     | 0.7241           | 580.56    | 0.6903           | 620.21     | 0.6617           | 649.52     | 0.6428           |
| [EtOHmim][PF <sub>6</sub> ]  |                  |            |                  |           |                  |            |                  |            |                  |
| 106.80                       | 0.4954           | 107.91     | 0.4026           | 128.36    | 0.4170           | 99.00      | 0.3316           | 44.76      | 0.1870           |
| 169.58                       | 0.5579           | 212.12     | 0.5070           | 236.46    | 0.5040           | 214.35     | 0.4427           | 118.23     | 0.3147           |
| 250.38                       | 0.6184           | 311.68     | 0.5709           | 339.36    | 0.5596           | 290.24     | 0.4894           | 218.99     | 0.4089           |

|                             |        |        |        |        |        |        |        |        |        |
|-----------------------------|--------|--------|--------|--------|--------|--------|--------|--------|--------|
| 322.08                      | 0.6628 | 432.22 | 0.6316 | 456.57 | 0.6093 | 390.81 | 0.5368 | 367.49 | 0.4910 |
| 474.91                      | 0.7424 | 519.34 | 0.6686 | 575.44 | 0.6514 | 538.29 | 0.5912 | 460.58 | 0.5293 |
| [EtOHmim][BF <sub>4</sub> ] |        |        |        |        |        |        |        |        |        |
| 98.94                       | 0.4515 | 115.56 | 0.3974 | 98.82  | 0.3231 | 102.72 | 0.2736 | 185.60 | 0.3237 |
| 208.96                      | 0.5659 | 196.55 | 0.4801 | 208.22 | 0.4418 | 170.32 | 0.3551 | 269.70 | 0.3856 |
| 293.29                      | 0.6247 | 336.04 | 0.5714 | 318.45 | 0.5159 | 286.04 | 0.4434 | 364.25 | 0.4457 |
| 344.47                      | 0.6549 | 408.83 | 0.6062 | 415.32 | 0.5645 | 407.15 | 0.5069 | 468.45 | 0.4917 |
| 426.89                      | 0.6983 | 500.62 | 0.6451 | 566.52 | 0.6240 | 547.02 | 0.5629 | 604.42 | 0.5425 |
| [EtOHmim][SCN]              |        |        |        |        |        |        |        |        |        |
| 95.29                       | 0.3522 | 94.73  | 0.2370 | 67.98  | 0.1653 | 106.65 | 0.1867 | 68.91  | 0.1095 |
| 134.67                      | 0.4205 | 186.49 | 0.3719 | 127.05 | 0.2645 | 171.22 | 0.2598 | 134.29 | 0.1803 |
| 191.13                      | 0.4932 | 307.78 | 0.4855 | 219.92 | 0.3684 | 314.50 | 0.3784 | 204.68 | 0.2450 |
| 307.60                      | 0.5979 | 409.85 | 0.5538 | 317.62 | 0.4463 | 406.22 | 0.4351 | 333.04 | 0.3357 |
| 421.64                      | 0.6720 | 487.59 | 0.5971 | 562.04 | 0.5793 | 592.38 | 0.5255 | 562.25 | 0.4545 |
| [EtOHmim][DCA]              |        |        |        |        |        |        |        |        |        |
| 75.04                       | 0.2985 | 139.81 | 0.2646 | 39.96  | 0.1051 | 42.10  | 0.0354 | 53.68  | 0.0828 |
| 108.48                      | 0.3754 | 241.15 | 0.4068 | 98.45  | 0.2159 | 96.79  | 0.1076 | 159.36 | 0.2050 |
| 206.36                      | 0.5231 | 295.52 | 0.4629 | 213.61 | 0.3634 | 199.05 | 0.2420 | 244.81 | 0.2790 |
| 309.45                      | 0.6222 | 368.11 | 0.5241 | 320.60 | 0.4552 | 298.62 | 0.3370 | 328.21 | 0.3393 |
| 397.68                      | 0.6856 | 457.18 | 0.5854 | 446.72 | 0.5363 | 542.50 | 0.4956 | 572.65 | 0.4714 |
| [EtOHmim][NO <sub>3</sub> ] |        |        |        |        |        |        |        |        |        |
| 61.85                       | 0.2455 | 61.84  | 0.1169 | 70.58  | 0.1511 | 71.88  | 0.1176 | 75.23  | 0.0994 |
| 106.62                      | 0.3427 | 103.46 | 0.2020 | 143.76 | 0.2546 | 116.27 | 0.1723 | 230.89 | 0.2384 |
| 201.72                      | 0.4754 | 206.33 | 0.3470 | 205.99 | 0.3201 | 224.75 | 0.2777 | 302.74 | 0.2880 |
| 314.28                      | 0.5766 | 301.46 | 0.4389 | 326.35 | 0.4191 | 312.98 | 0.3432 | 413.78 | 0.3516 |
| 454.15                      | 0.6665 | 532.16 | 0.5862 | 559.65 | 0.5494 | 517.06 | 0.4589 | 516.03 | 0.4033 |

**6. The equilibrium time of [EtOHmim][NTf<sub>2</sub>] and [Emim][NTf<sub>2</sub>] at 313.15 K.**

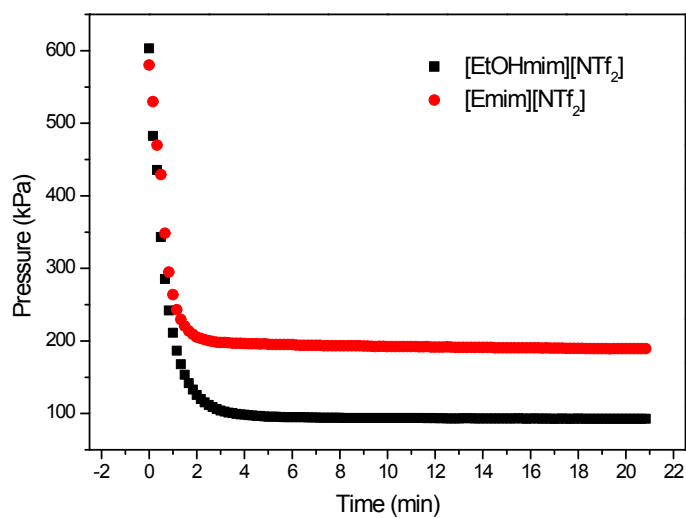

**Figure S3.** The variation of pressure with time for ammonia absorption in [EtOHmim][NTf<sub>2</sub>] and [Emim][NTf<sub>2</sub>] at 313.15 K.

#### 7. FT-IR and <sup>1</sup>H NMR spectra of ILs.

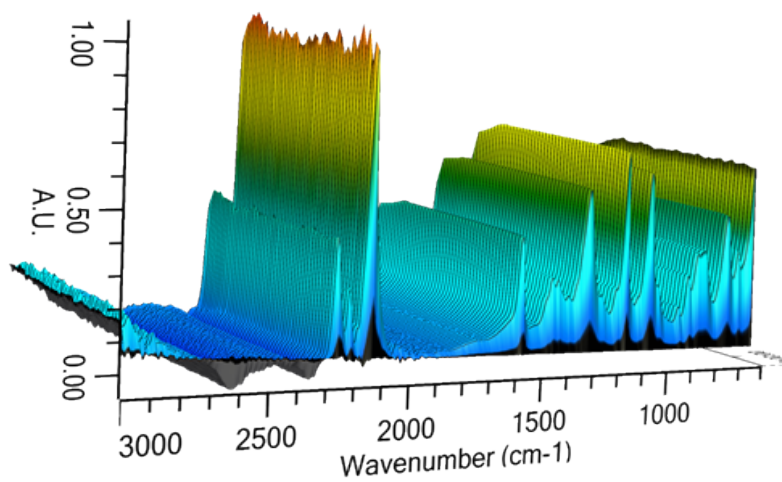

**Figure S4.** The variation of in-situ IR spectra of [EtOHmim][DCA] in NH<sub>3</sub> absorption process.

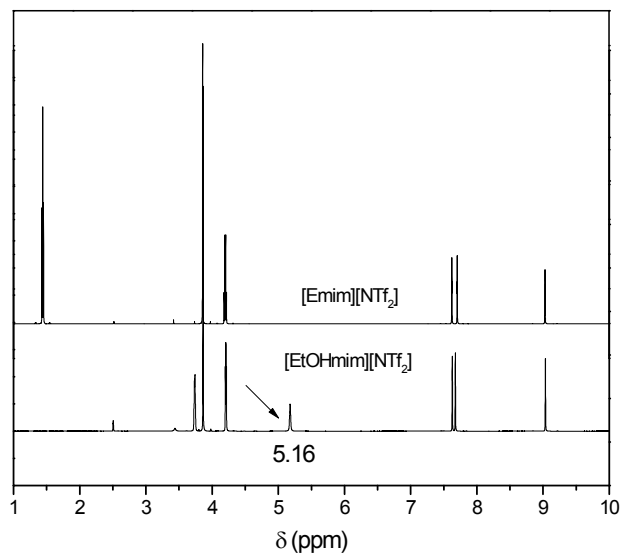

**Figure S5.**  $^1\text{H}$  NMR spectra of  $[\text{EtOHmim}][\text{NTf}_2]$  and  $[\text{Emim}][\text{NTf}_2]$ .
